# Supplementary material for: Combination of Zearalenone and Deoxynivalenol Induces Apoptosis by Mitochondrial Pathway in Piglet Sertoli Cells: Role of Endoplasmic Reticulum Stress
Source: MDPI journal article supplement (doi:10.3390/toxins15070471), 2023-07-21
Supplement: s1 [file s1]

Table S1. Primers for different genes used in this study.

| Genes           | Accession Number | Primer  | Primer sequences (5'→3') | Product Size/bp |
|-----------------|------------------|---------|--------------------------|-----------------|
| <i>GAPDH</i>    | NM_001206359.1   | Forward | TGACCCCTTCATTGACCTCC     | 160             |
|                 |                  | Reverse | CCATTTGATGTTGGCGGGAT     |                 |
| <i>Bid</i>      | NM_001030535.1   | Forward | CAACGGTGAAC TTCATCAAC    | 70              |
|                 |                  | Reverse | CAGTCCATCTCACTTTGGAC     |                 |
| <i>Bcl-2</i>    | XM_021099593.1   | Forward | TCCAGGCAGTTTAATACATTC    | 80              |
|                 |                  | Reverse | TCCCTTTATACACTGGGTGA     |                 |
| <i>Caspase9</i> | XM_013998997.2   | Forward | GAGACAGCTCAAATTGCAGG     | 101             |
|                 |                  | Reverse | TTCGCCTCTCTTTCTCCATC     |                 |
| <i>Mfn2</i>     | XM_021095349.1   | Forward | CGGGAAGGTGAAGAATTGGA     | 127             |
|                 |                  | Reverse | CTTCACAGGGTAGGCATCAT     |                 |
| <i>Drp1</i>     | XM_021092060.1   | Forward | TGGCTAATAGAAATGGAACA     | 120             |
|                 |                  | Reverse | GATACTGAGCAGCAAGAACA     |                 |
| <i>P53</i>      | NM_213824.3      | Forward | GAGCTGCAATGGAGGAGTC      | 85              |
|                 |                  | Reverse | AGCAGTTTCCACAAGTCTGA     |                 |
